# Supplementary material
Source: Springer Nature journal article supplement (https://www.springermedizin.de/resource/supplementary/12884_2011_500_MOESM1_ESM.pdf/9458006)
Supplement: MOESM1 [file 9458006]

| Morbidity Group          | Any Diagnosis (n=4120) |           | RDS (n=135) |         | Other complications of prematurity (n=1167) |         |
|--------------------------|------------------------|-----------|-------------|---------|---------------------------------------------|---------|
| Control Variables        | OR                     | 95% CI    | OR          | 95% CI  | OR                                          | 95% CI  |
| Maternal diabetes        | <b>4.1</b>             | 3.5-4.7   | <b>0.4</b>  | 0.2-1.0 | <b>8.1</b>                                  | 6.9-9.5 |
| primiparity              | <b>1.6</b>             | 1.5-1.8   | 0.9         | 0.6-1.4 | <b>1.7</b>                                  | 1.5-2.0 |
| maternal age group (yrs) | p=0.10                 |           | p=0.86      |         |                                             |         |
| <19 vs 19-34             | 0.9                    | 0.7-1.0   | 0.9         | 0.4-2.3 | <b>0.7</b>                                  | 0.5-0.9 |
| >34 vs 19-34             | 1.1                    | 0.9-1.2   | 1.1         | 0.7-1.9 | 1.1                                         | 0.9-1.3 |
| induced delivery         | <b>1.4</b>             | 1.3-1.5   | 1.3         | 0.9-2.0 | <b>1.4</b>                                  | 1.2-1.6 |
| male infant              | <b>1.2</b>             | 1.1-1.3   | <b>2.0</b>  | 1.4-3.0 | 1.1                                         | 0.9-1.2 |
| caesarean section        | <b>1.5</b>             | 1.4-1.7   | <b>1.9</b>  | 1.2-2.9 | <b>1.4</b>                                  | 1.3-1.6 |
| multiple gestation       | 0.9                    | 0.8-1.2   | 1.4         | 0.9-2.4 | 1.2                                         | 0.9-1.5 |
| SGA                      | <b>1.6</b>             | 1.4-1.8   | 0.6         | 0.3-1.2 | <b>1.8</b>                                  | 1.5-2.2 |
| LGA                      | <b>1.5</b>             | 1.4-1.7   | 0.9         | 0.5-1.6 | <b>1.5</b>                                  | 1.3-1.7 |
| any congenital anomaly   | <b>28.8</b>            | 23.2-35.7 | <b>3.0</b>  | 1.7-5.2 | <b>2.6</b>                                  | 2.1-3.3 |
| rural residence          | 1.0                    | 0.9-1.1   | NA          |         | <b>0.8</b>                                  | 0.7-0.9 |
| any breastfeeding        | 1.0                    | 0.9-1.1   | NA          |         | 1.0                                         | 0.8-1.1 |
| need for resuscitation   | <b>3.7</b>             | 3.3-4.1   | <b>2.0</b>  | 1.6-2.4 | <b>1.7</b>                                  | 1.4-2.0 |

| Morbidity Group          | Other respiratory (n=1392) |          | SCU (n=2299) |         | phototherapy (n=819) |          |
|--------------------------|----------------------------|----------|--------------|---------|----------------------|----------|
| Control Variables        | OR                         | 95% CI   | OR           | 95% CI  | OR                   | 95% CI   |
| Maternal diabetes        | 1.2                        | 0.9-1.5  | <b>2.8</b>   | 2.4-3.4 | <b>2.3</b>           | 1.8-2.9  |
| primiparity              | 1.2                        | 1.0-1.3  | <b>1.3</b>   | 1.2-1.4 | <b>1.9</b>           | 1.6-2.3  |
| maternal age group (yrs) | p=0.86                     |          | p=0.32       |         | p=0.16               |          |
| <19 vs 19-34             | 0.8                        | 0.6-1.0  | 0.9          | 0.7-1.1 | 1.1                  | 0.8-1.5  |
| >34 vs 19-34             | 0.9                        | 0.8-1.1  | 0.9          | 0.8-1.1 | 1.2                  | 0.99-1.5 |
| induced delivery         | 1.1                        | 0.99-1.3 | <b>1.5</b>   | 1.3-1.6 | <b>1.3</b>           | 1.1-1.5  |
| male infant              | <b>1.4</b>                 | 1.3-1.6  | <b>1.3</b>   | 1.2-1.4 | <b>1.2</b>           | 1.0-1.4  |
| caesarean section        | <b>1.8</b>                 | 1.6-2.1  | <b>1.5</b>   | 1.4-1.7 | 1.0                  | 0.8-1.2  |
| multiple gestation       | 1.0                        | 0.7-1.3  | <b>1.4</b>   | 1.1-1.8 | <b>0.6</b>           | 0.4-0.8  |
| SGA                      | 0.8                        | 0.7-1.1  | <b>2.7</b>   | 2.3-3.1 | <b>2.3</b>           | 1.8-2.9  |
| LGA                      | 1.1                        | 0.9-1.3  | <b>1.3</b>   | 1.1-1.5 | <b>1.6</b>           | 1.3-2.0  |
| any congenital anomaly   | <b>2.2</b>                 | 1.7-2.8  | <b>6.4</b>   | 5.2-7.8 | <b>1.7</b>           | 1.2-2.3  |
| rural residence          | <b>0.9</b>                 | 0.8-0.99 | <b>0.5</b>   | 0.4-0.5 | 1.0                  | 0.9-1.2  |
| any breastfeeding        | 0.9                        | 0.8-1.0  | <b>0.7</b>   | 0.7-0.8 | <b>1.3</b>           | 1.0-1.6  |
| need for resuscitation   | <b>6.6</b>                 | 5.8-7.5  | <b>4.6</b>   | 4.1-5.3 | <b>1.5</b>           | 1.2-1.8  |
